# Supplementary material
Source: MDPI journal article supplement (https://www.mdpi.com/1424-8247/15/5/541)
Supplement: s1 [file s1]

# Synthesis, Biological Activity and Molecular Modelling Studies of Naphthoquinone

## Derivatives as Promising Anticancer Candidates Targeting COX-2

Povilas Kavaliauskas <sup>1,2,3,4,5,\*</sup>, Felipe Stambuk Opazo <sup>6</sup>, Waldo Acevedo <sup>7</sup>, Ruta Petraitiene <sup>2,4</sup>,  
Birutė Grybaitė <sup>1</sup>, Kazimieras Anusevičius <sup>1</sup>, Vytautas Mickevičius <sup>1,4</sup>, Sergey Belyakov <sup>8</sup> and  
Vidmantas Petraitis <sup>2,4,7</sup>

\* To whom the correspondence should be addressed: Povilas Kavaliauskas, Kaunas University of Technology, Department of Organic Chemistry. Radvilenu rd. 19, LT-50254 Kaunas, Lithuania Email: pok4001@med.cornell.edu

- <sup>1</sup> Department of Organic Chemistry, Kaunas University of Technology, Radvilenu Rd. 19, LT-50254 Kaunas, Lithuania; birute.grybaite@ktu.lt (B.G.); kazimieras.anusevicius@ktu.lt (K.A.); vytautas.mickevicius@ktu.lt (V.M.)
- <sup>2</sup> Joan and Sanford I. Weill Department of Medicine, Weill Cornell University, 1300 York Avenue, New York, NY 10065, USA; rop2016@med.cornell.edu (R.P.); vip2007@med.cornell.edu (V.P.)
- <sup>3</sup> Department of Microbiology and Immunology, University of Maryland School of Medicine, 655 W. Baltimore Street, Baltimore, MD 21201, USA
- <sup>4</sup> Institute of Infectious Diseases and Pathogenic Microbiology, Birstono Str. 38A, LT-59116 Prienai, Lithuania
- <sup>5</sup> Biological Research Center, Lithuanian University of Health Sciences, Tilzes Str. 18, LT-47181 Kaunas, Lithuania
- <sup>6</sup> Instituto de Biología, Facultad de Ciencias, Pontificia Universidad Católica de Valparaíso, Valparaíso. Av. Universidad N° 330, Curauma, Valparaíso 2373223, Chile; felipe.stambuk.o@mail.pucv.cl
- <sup>7</sup> Instituto de Química, Facultad de Ciencias, Pontificia Universidad Católica de Valparaíso, Valparaíso. Av. Universidad N° 330, Curauma, Valparaíso 2373223, Chile; waldo.acevedo@pucv.cl
- <sup>8</sup> Latvian Institute of Organic Synthesis, Laboratory of Physical Organic Chemistry, Aizkraukles 21, LV-1006 Riga, Latvia; serg@osi.lv

Content:

Supplemental Figures S1–S16, representing <sup>1</sup>H and <sup>13</sup>C NMR spectra of all the newly synthesized compounds **9–16**.

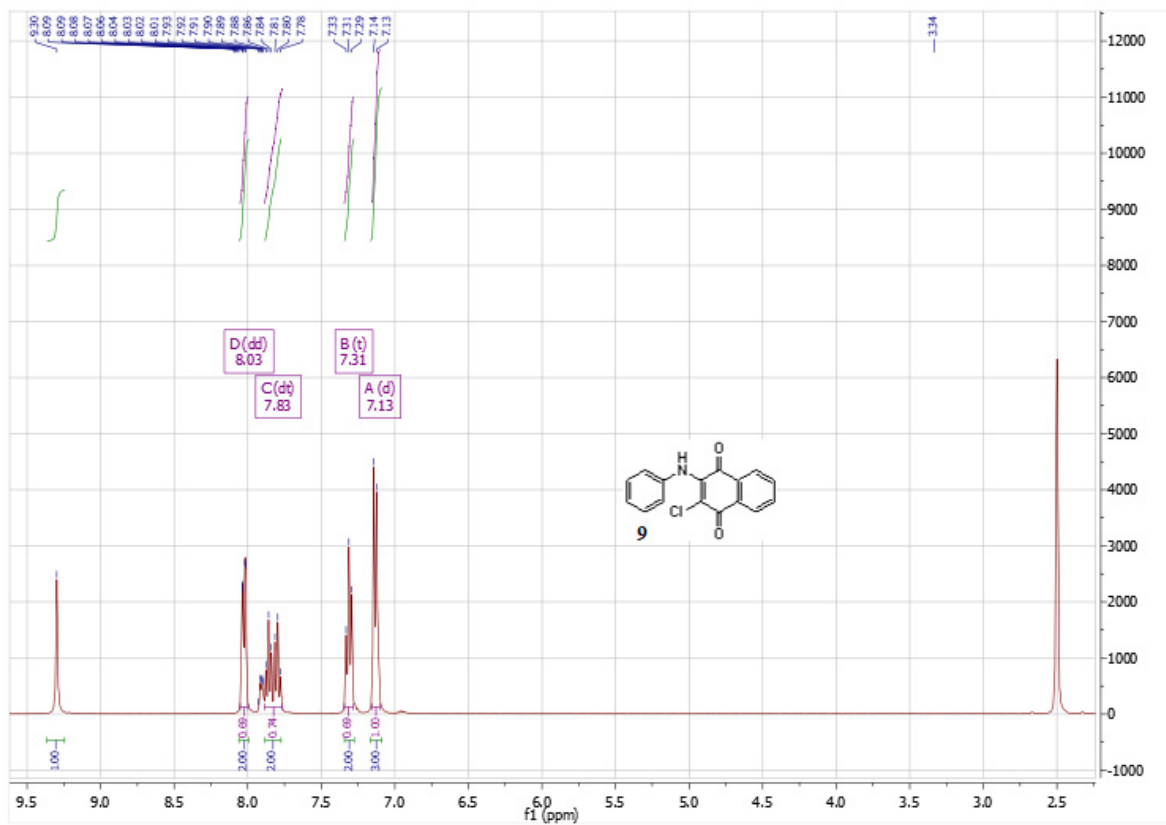

Figure S1:  $^1\text{H-NMR}$  spectrum of compound 9.

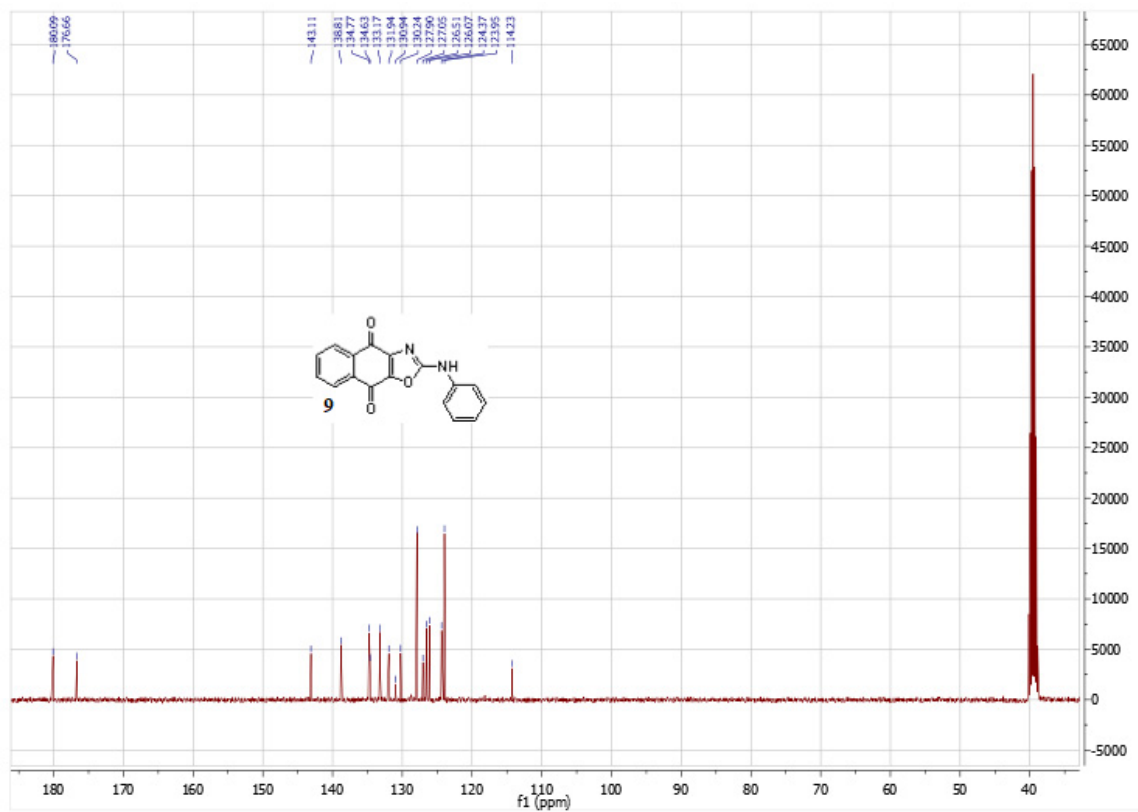

Figure S2:  $^{13}\text{C-NMR}$  spectrum of compound 9.

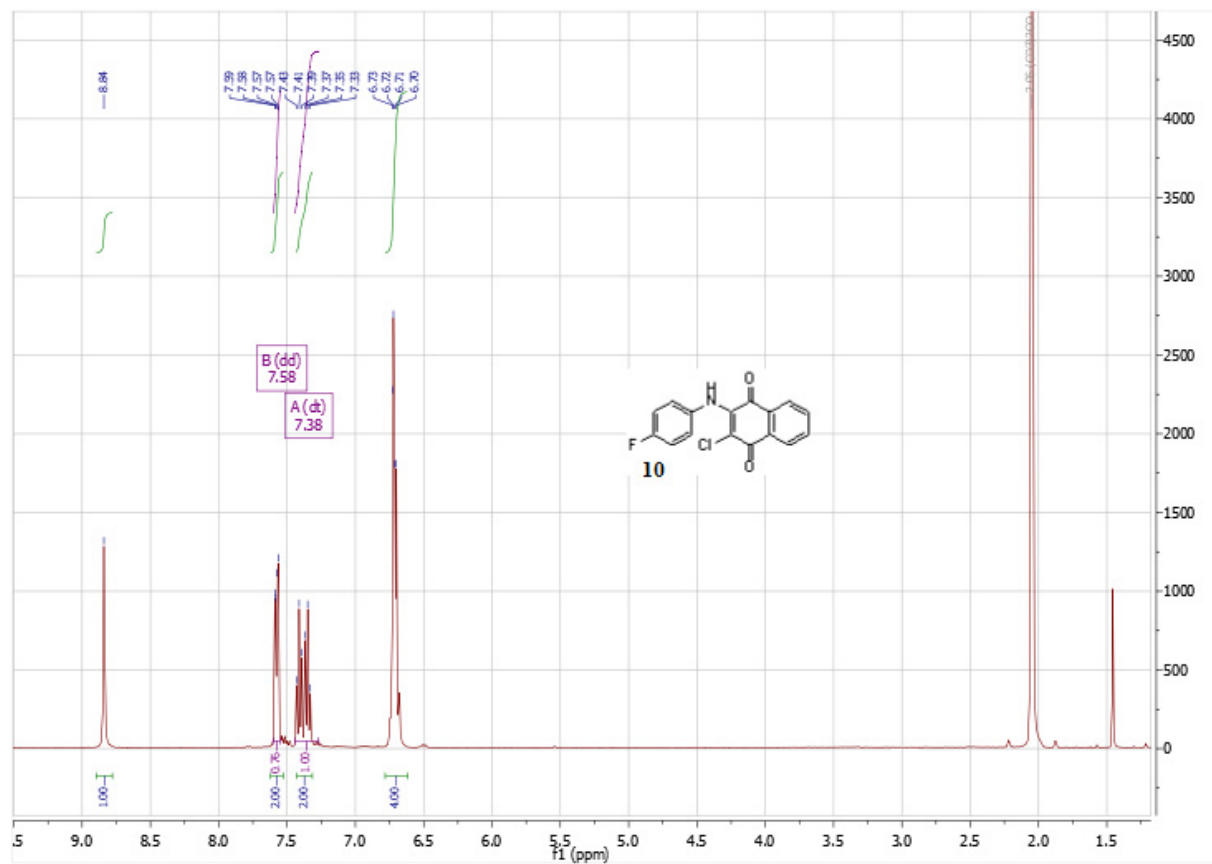

Figure S3: <sup>1</sup>H-NMR spectrum of compound 10.

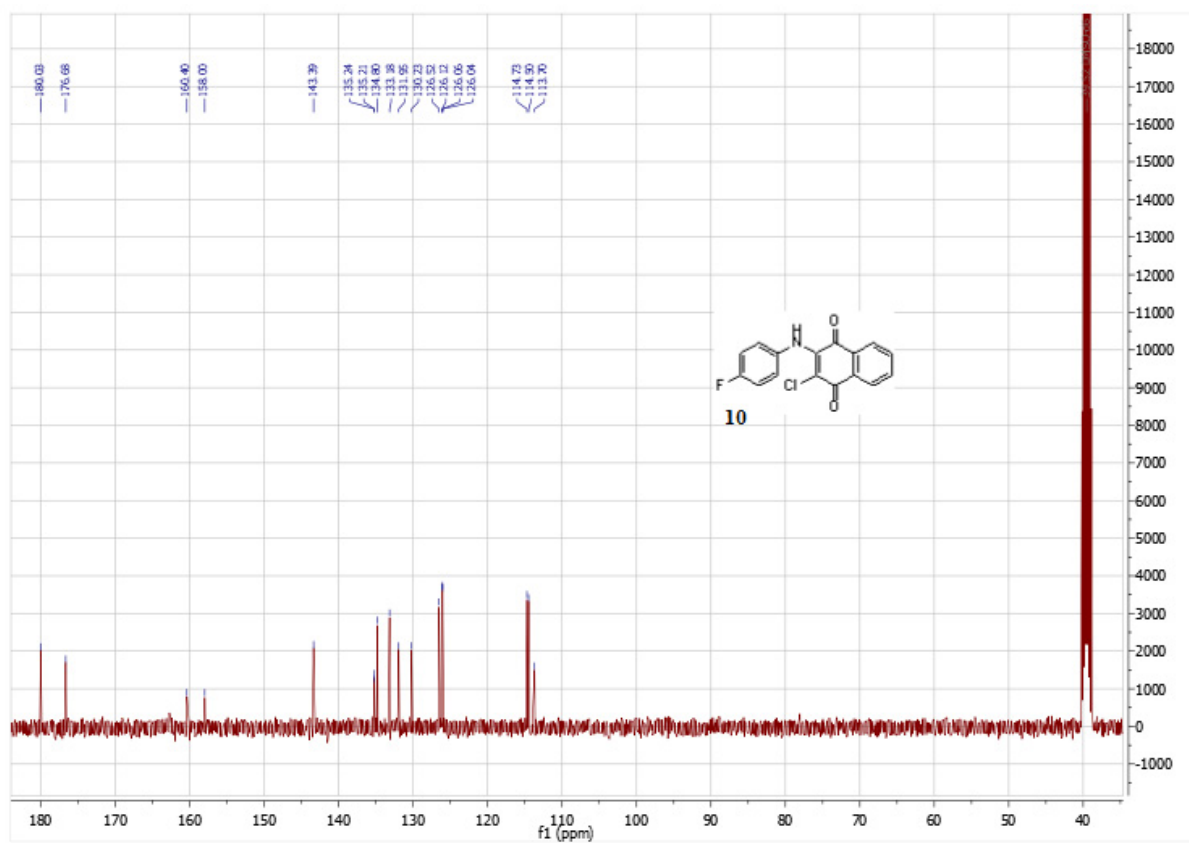

Figure S4: <sup>13</sup>C-NMR spectrum of compound 10.

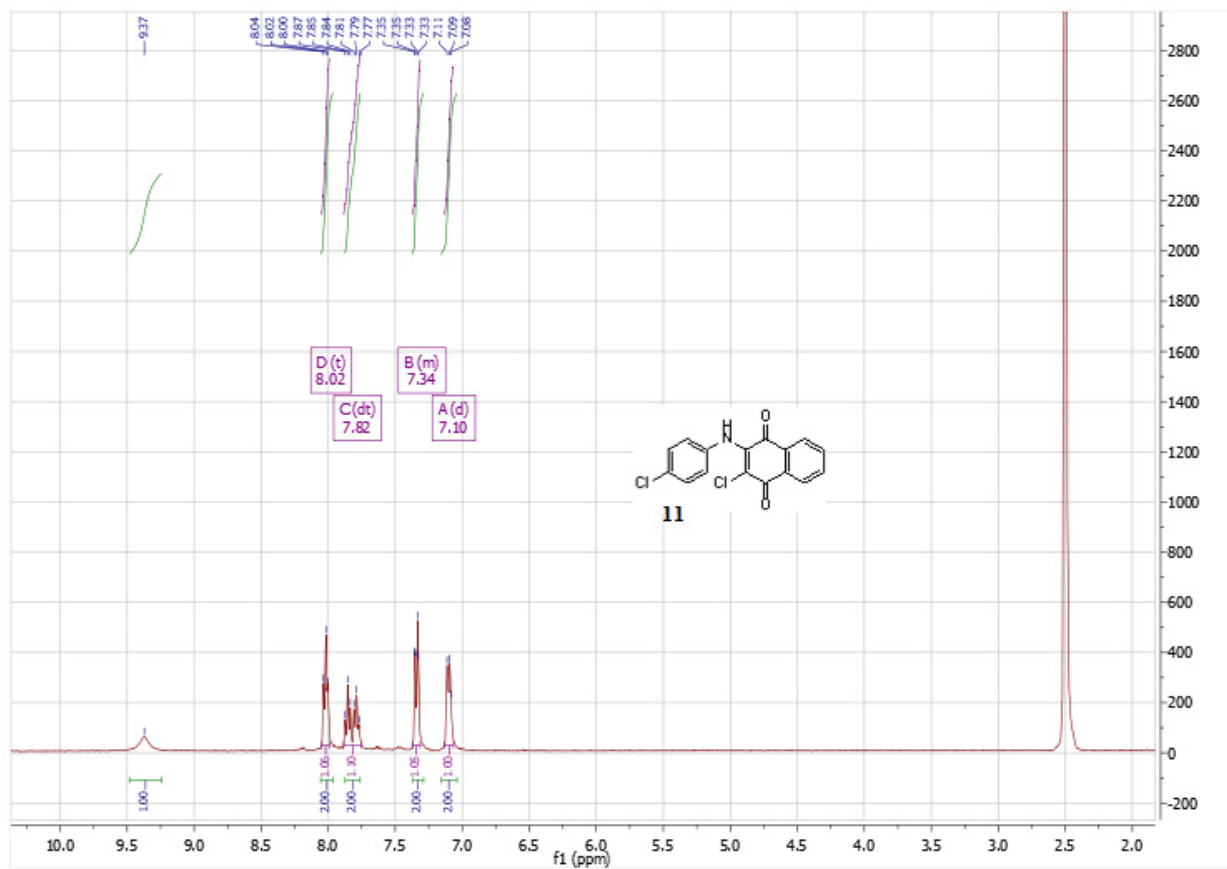

**Figure S5:  $^1\text{H}$ -NMR spectrum of compound 11.**

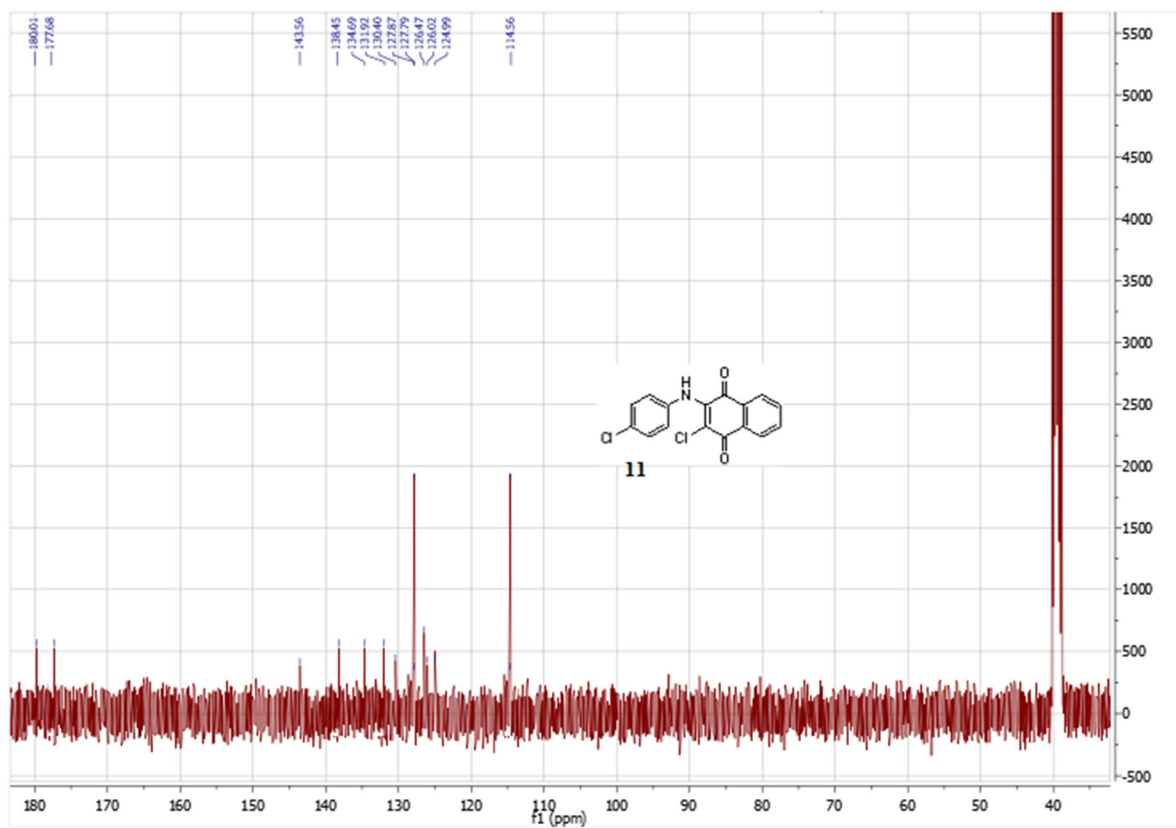

**Figure S6:  $^{13}\text{C}$ -NMR spectrum of compound 11.**

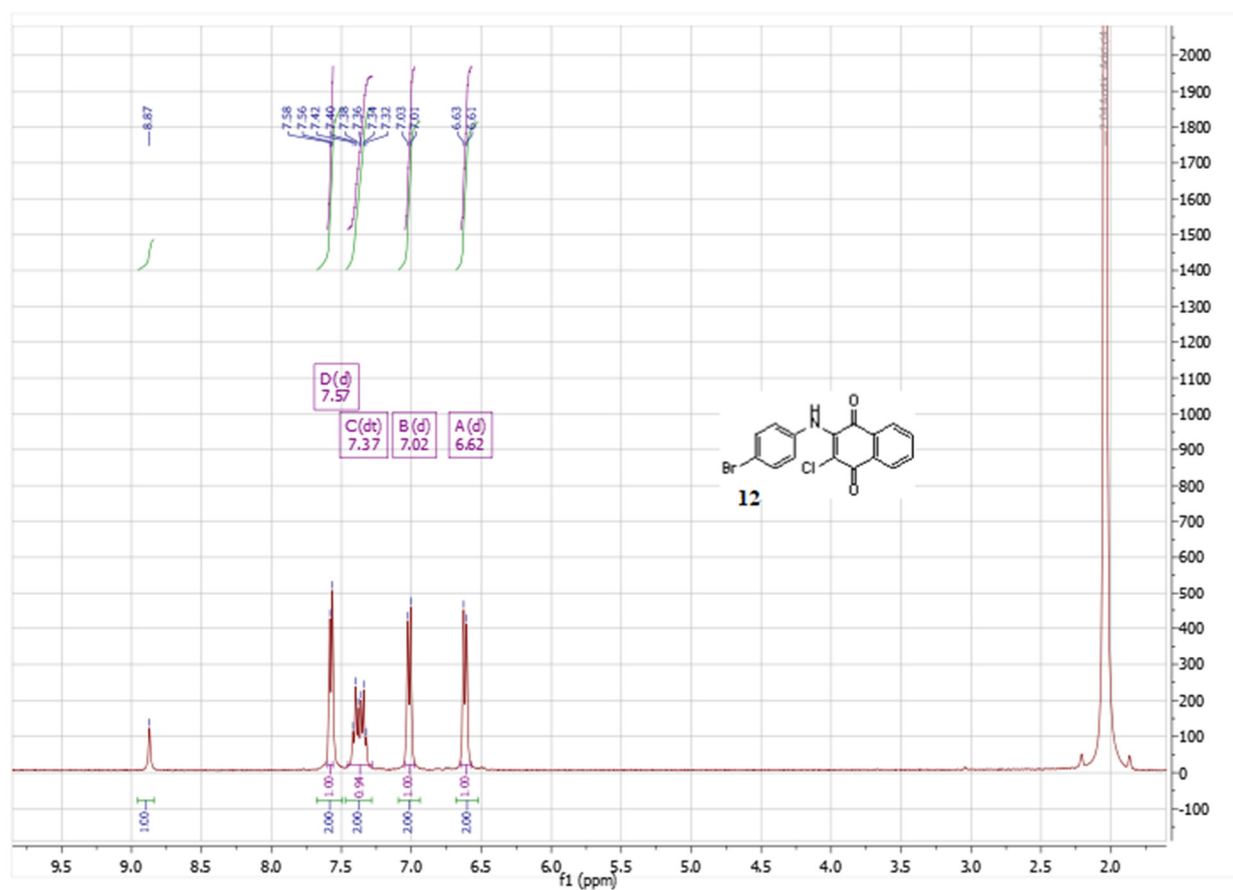

**Figure S7:**  $^1\text{H}$ -NMR spectrum of compound **12**.

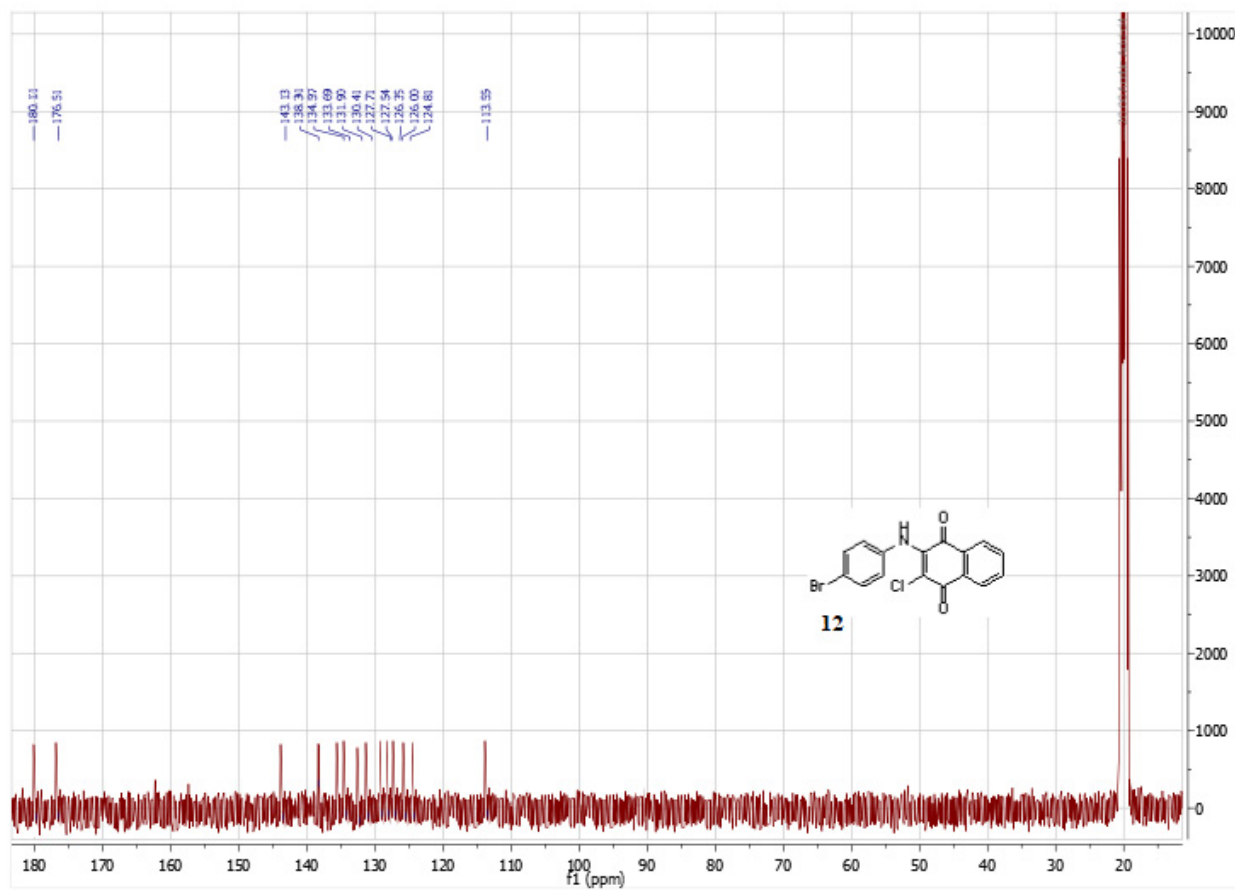

Figure S8:  $^{13}\text{C}$ -NMR spectrum of compound 12.

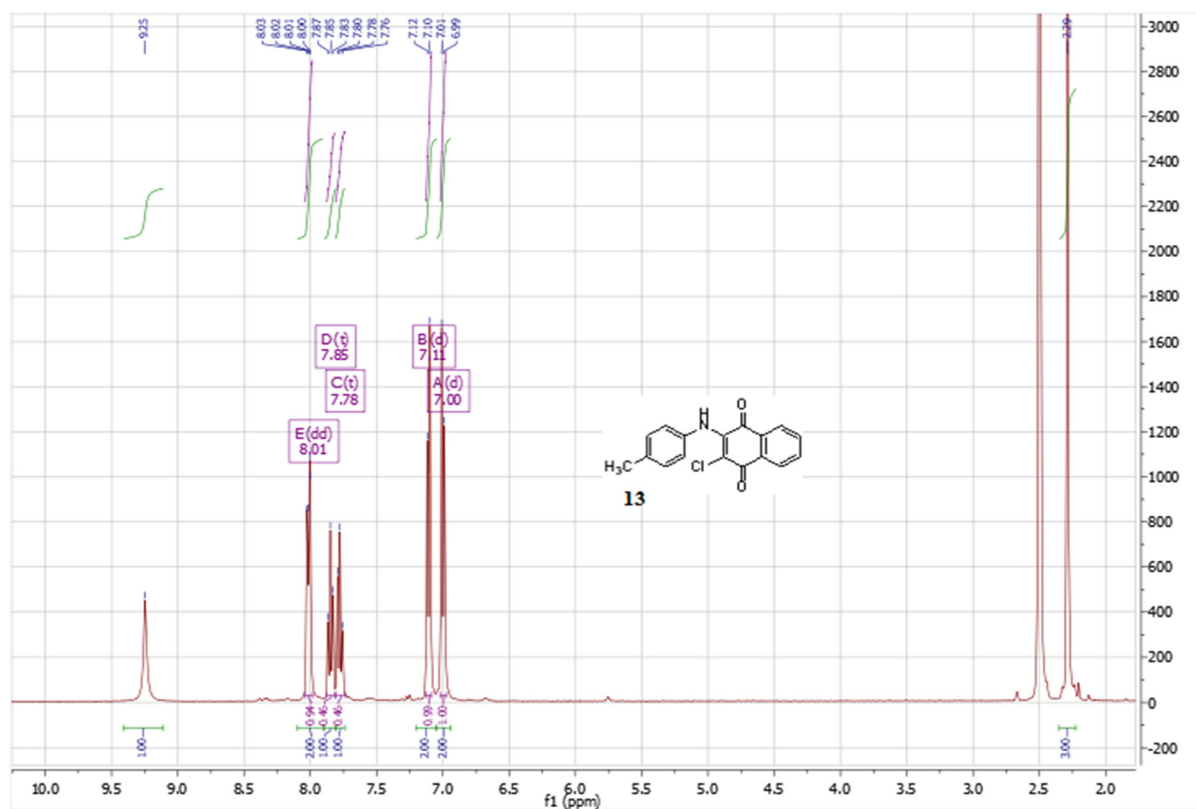

Figure S9:  $^1\text{H}$ -NMR spectrum of compound 13.

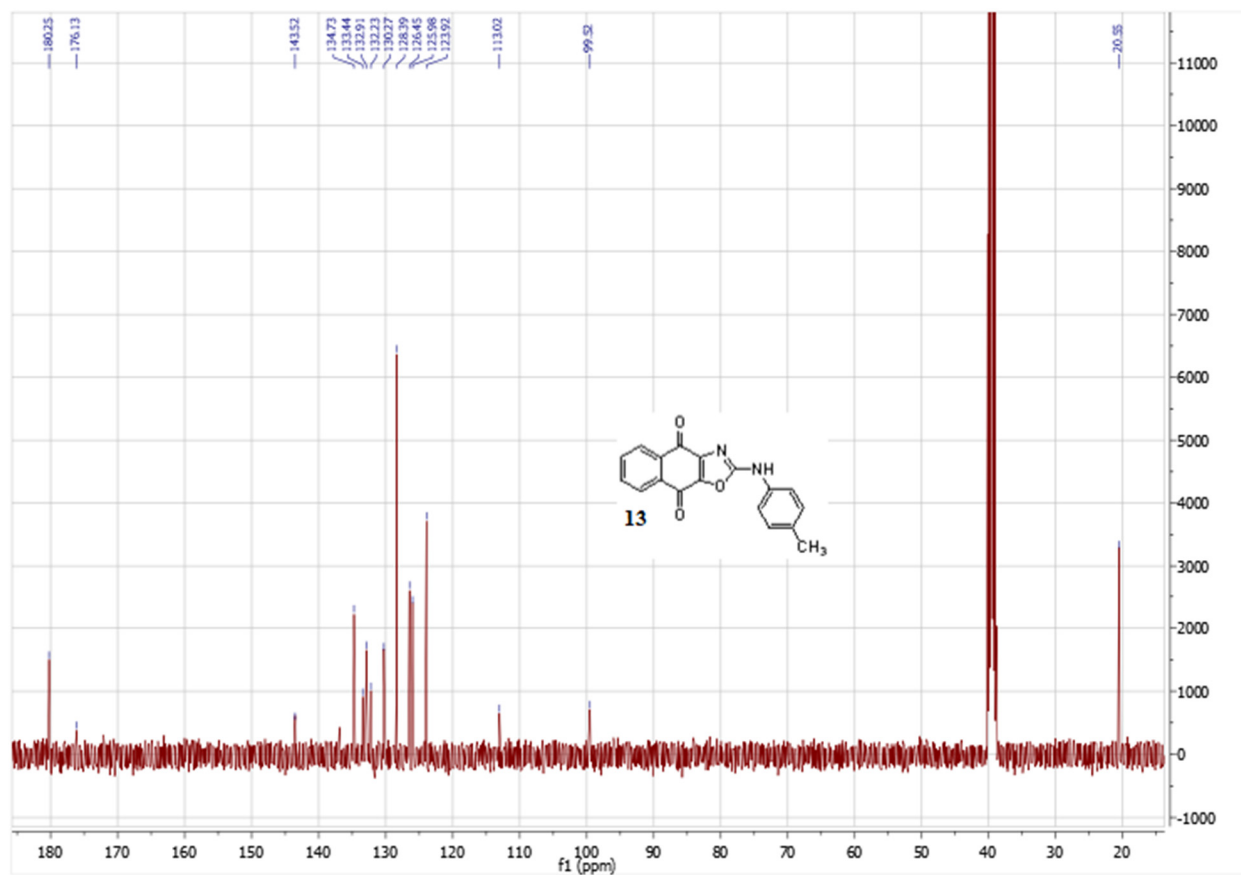

Figure S10: <sup>13</sup>C-NMR spectrum of compound 13.

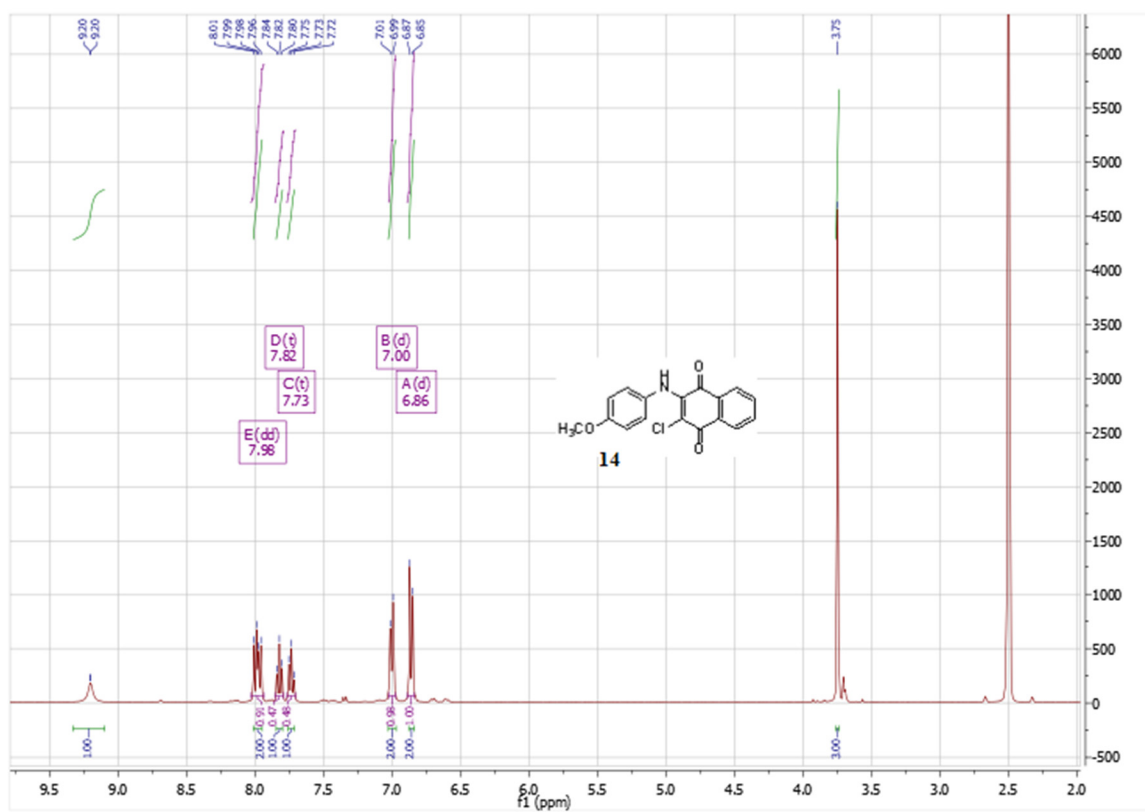

Figure S11: <sup>1</sup>H-NMR spectrum of compound 14.

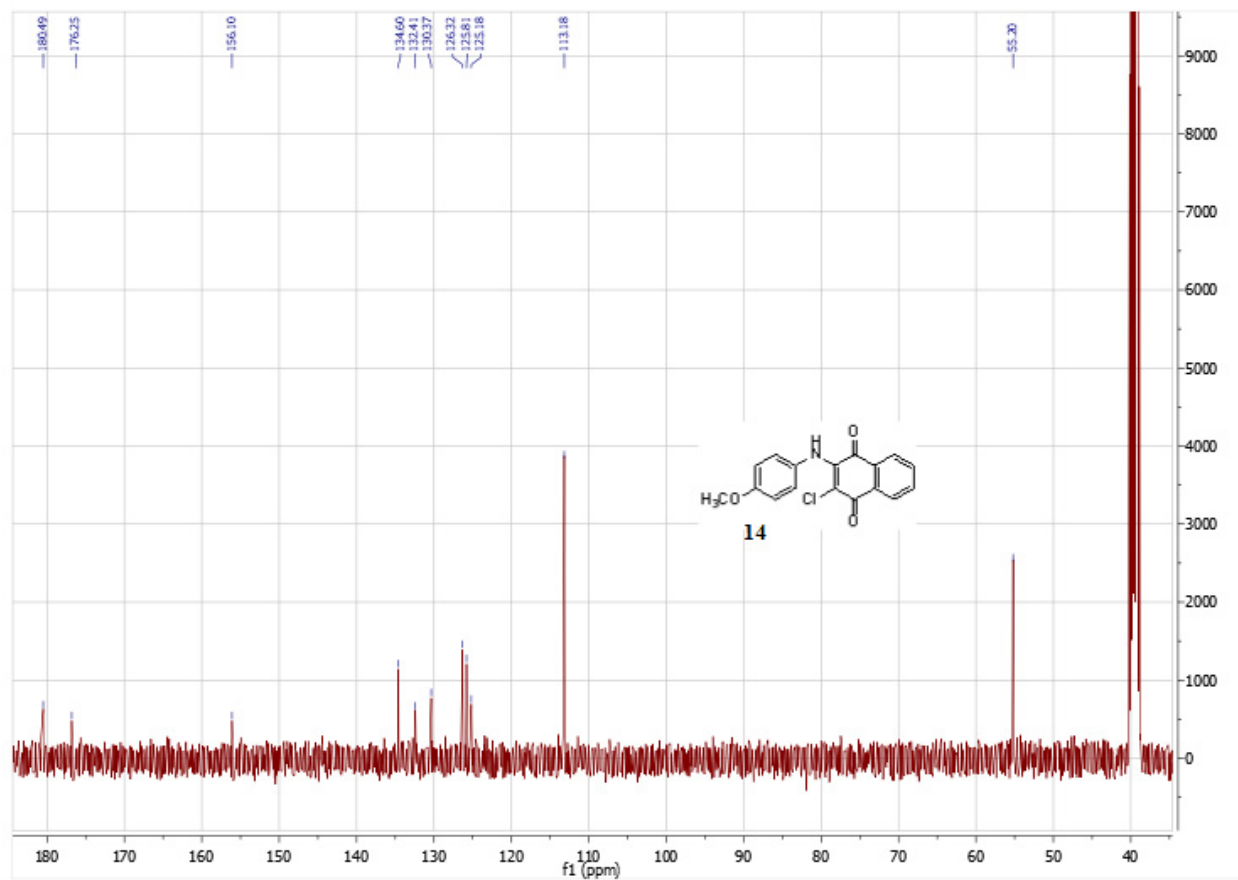

Figure S12:  $^{13}\text{C}$ -NMR spectrum of compound 14.

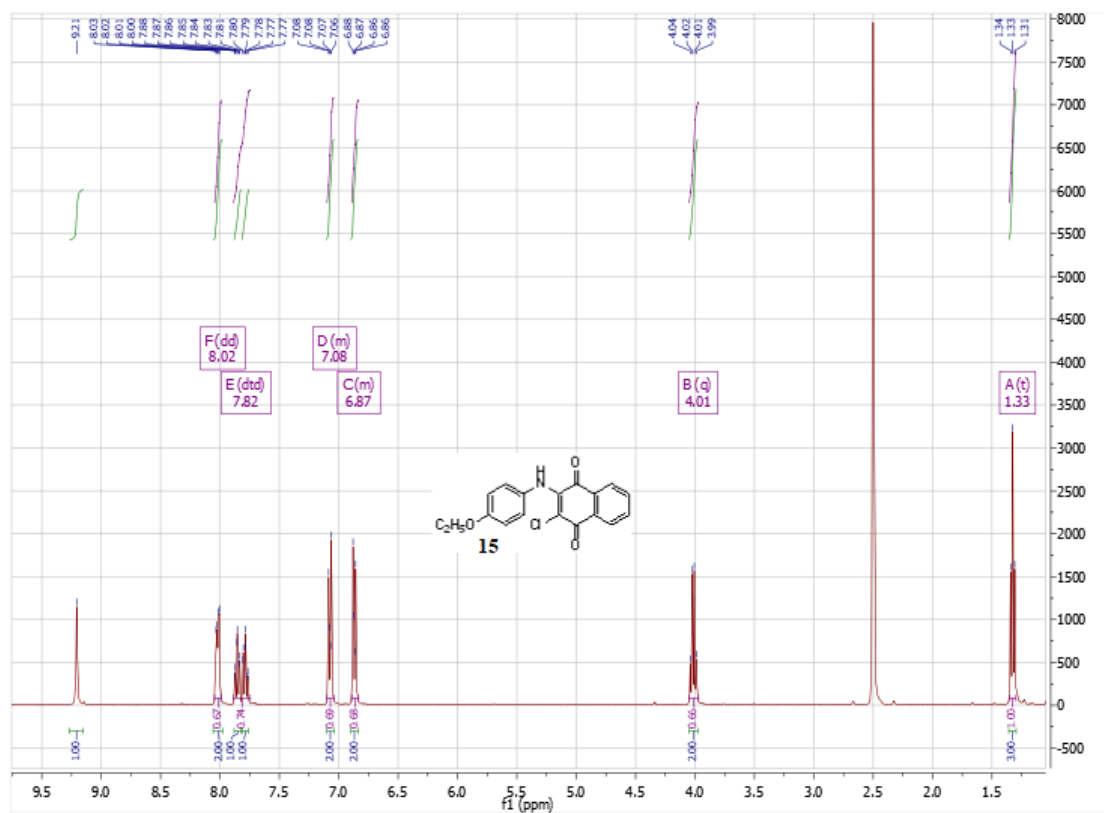

Figure S13:  $^1\text{H}$ -NMR spectrum of compound 15.



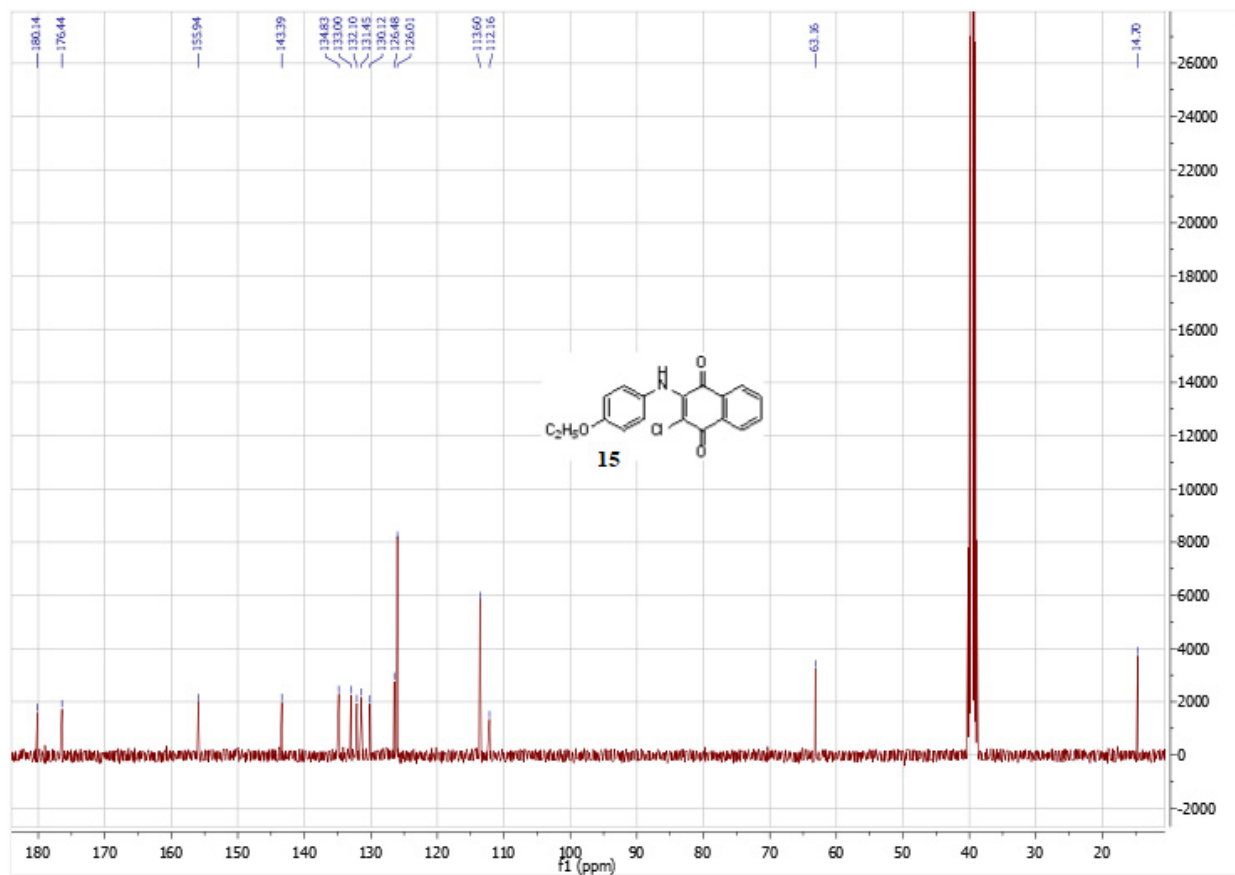

Figure S14: <sup>13</sup>C-NMR spectrum of compound 15.

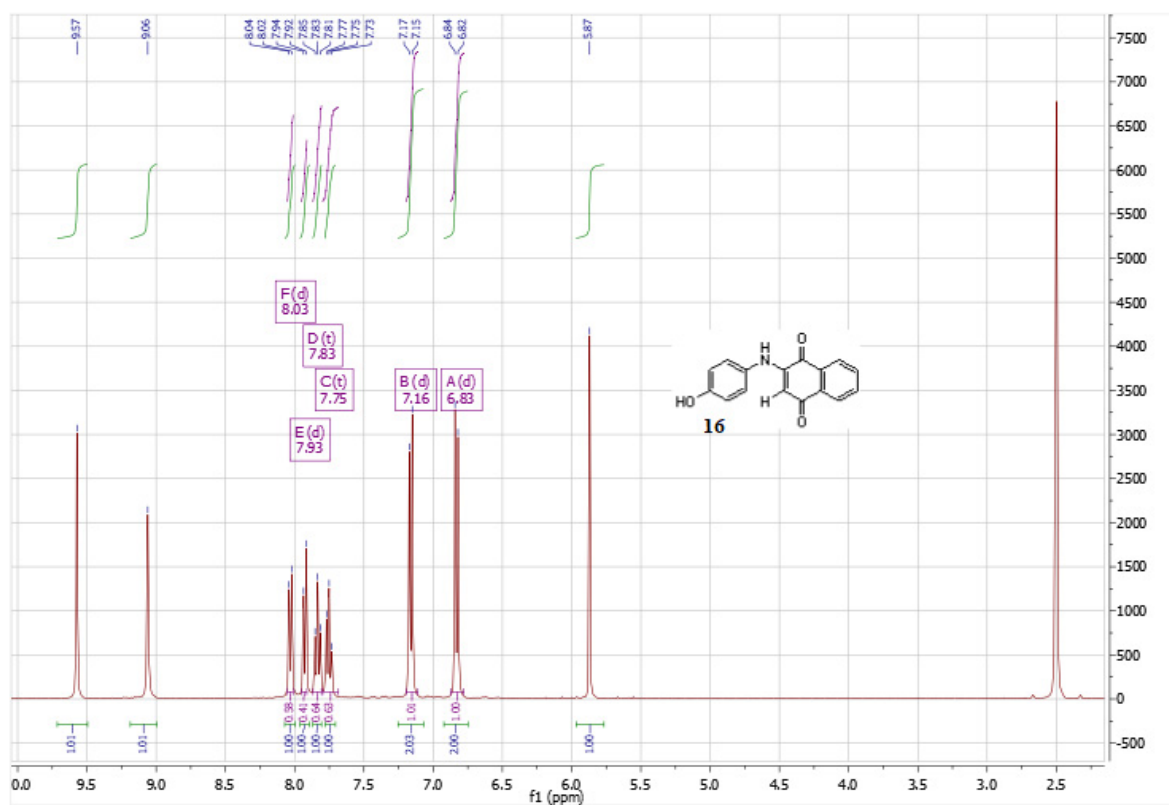

Figure S15: <sup>1</sup>H-NMR spectrum of compound 16.

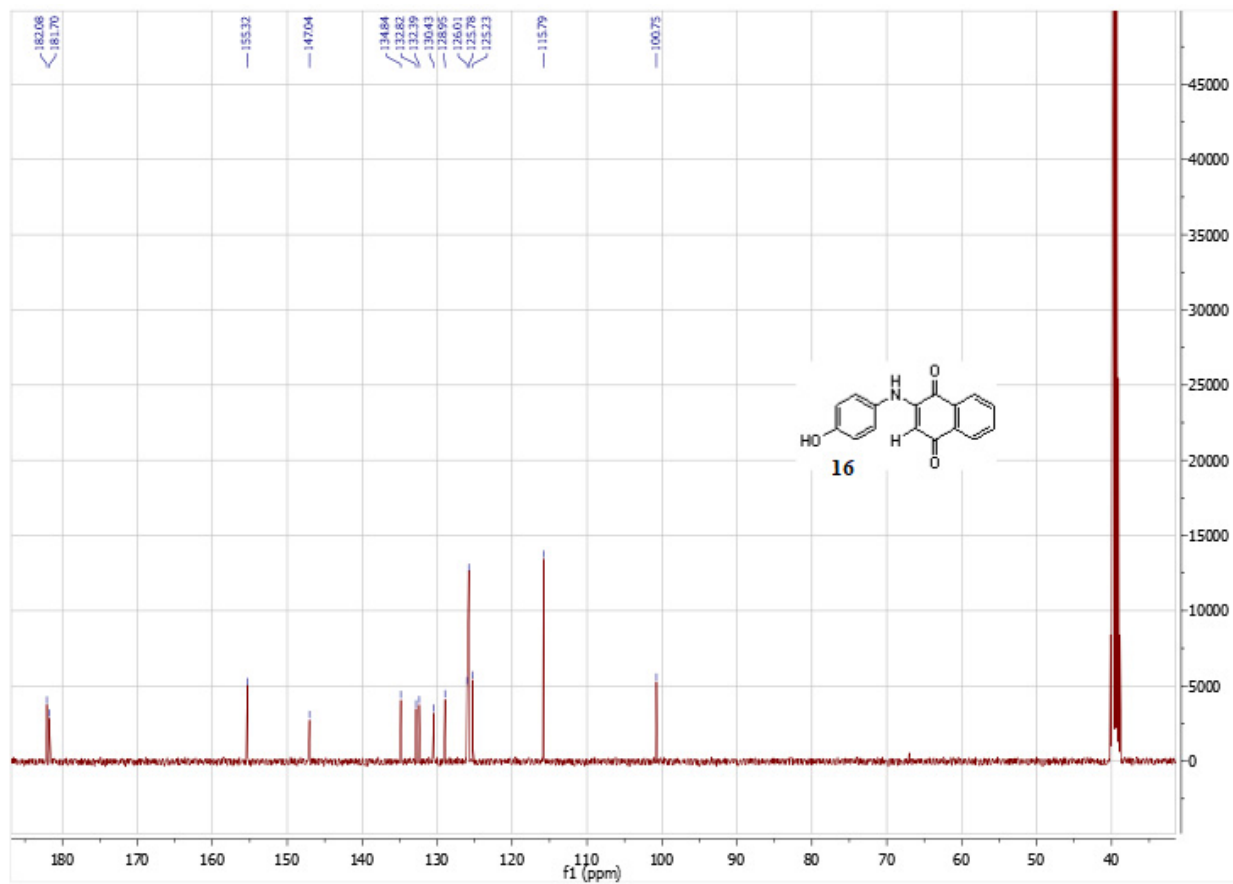

**Figure S16:**  $^{13}\text{C}$ -NMR spectrum of compound **16**.
